# Supplementary material
Source: PubMed Central journal article supplement (PMC9722866)
Supplement: 12276_2022_871_MOESM1_ESM.pdf [file 12276_2022_871_MOESM1_ESM.pdf]

**<Supplemental materials>**

**A database of 5,305 healthy Korean individuals reveals genetic and clinical implications for an East Asian population**

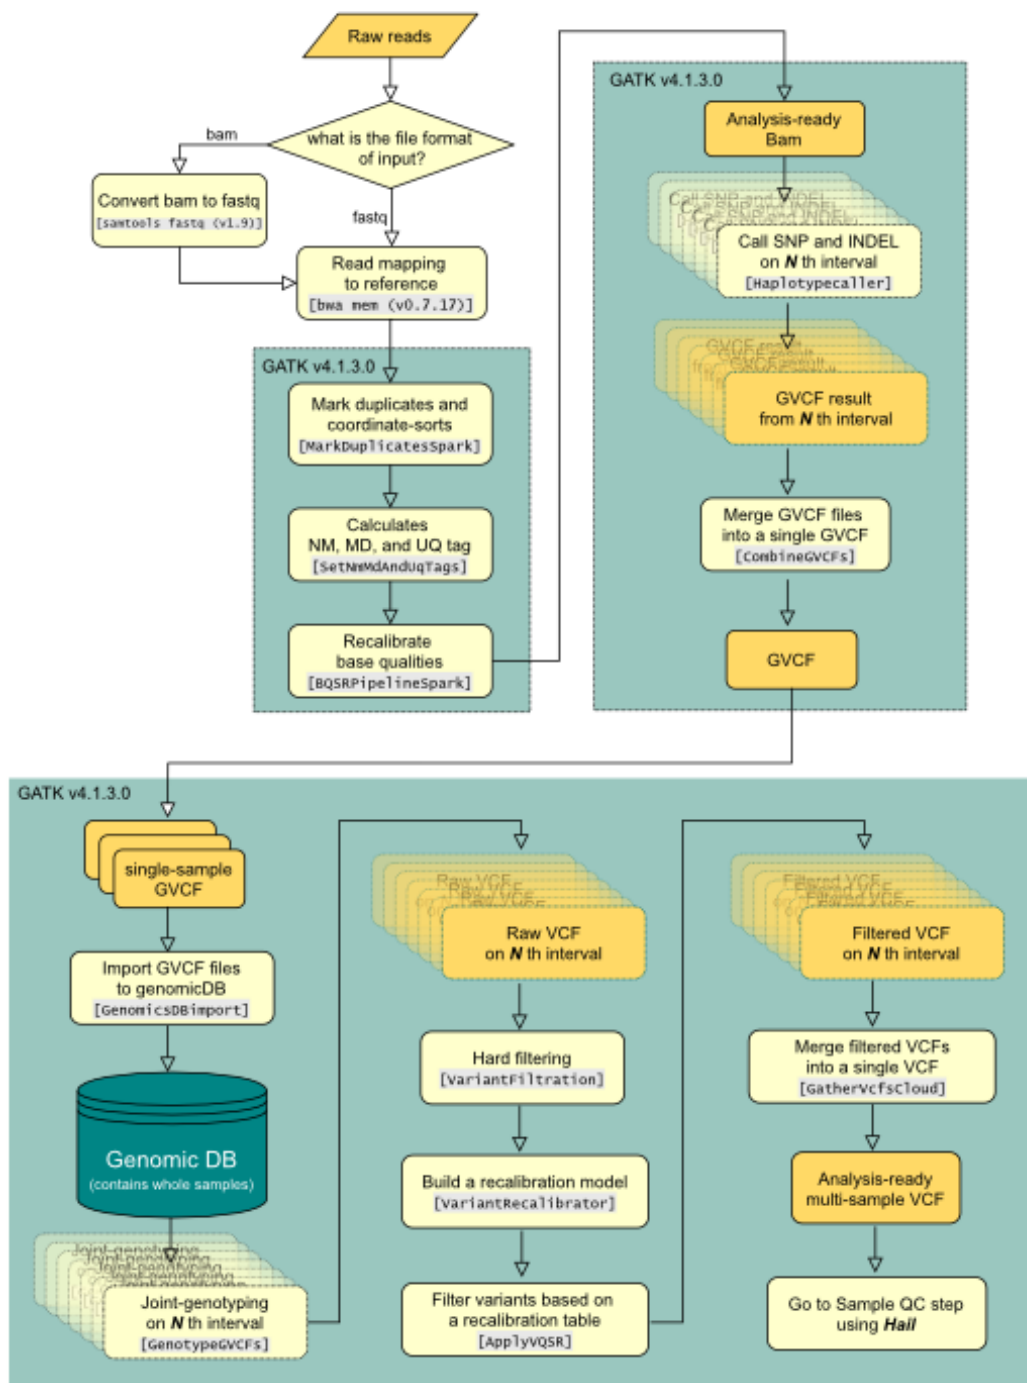

**Supplementary Fig. 1. Variant calling pipeline.** The name of the tool or function for each step is described in the bracket in a gray background. If the same procedure is performed in a reiterative manner, the step is depicted in overlapped boxes. The subsequent steps after BWA mapping are all proceeded using GATK v4.1.3.0.

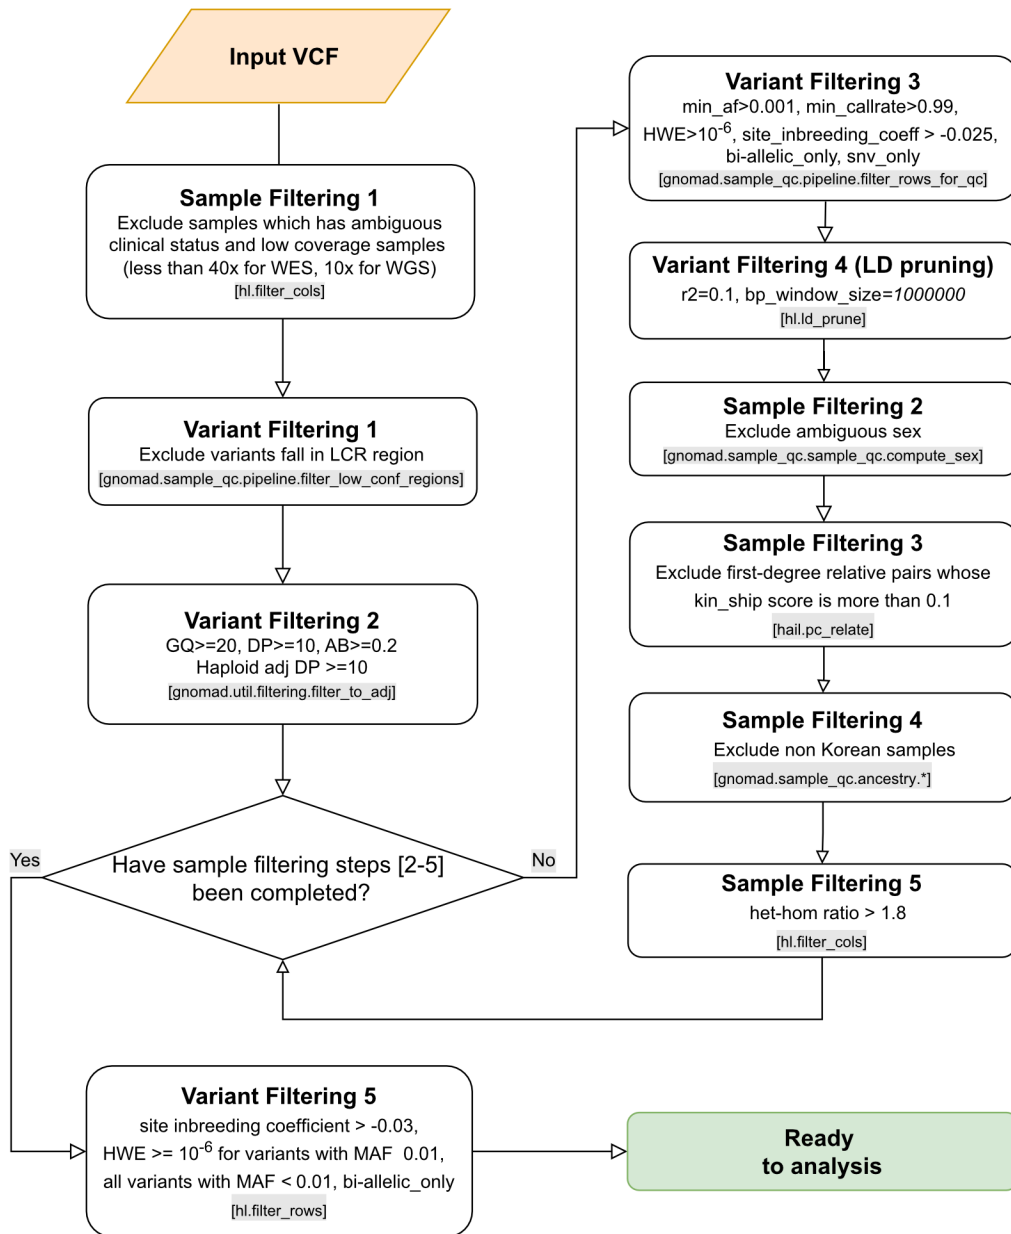

**Supplementary Fig. 2. Quality control process.** Input VCF is the output of the pipeline in Fig S1. Each block contains the Hail function in gray background.

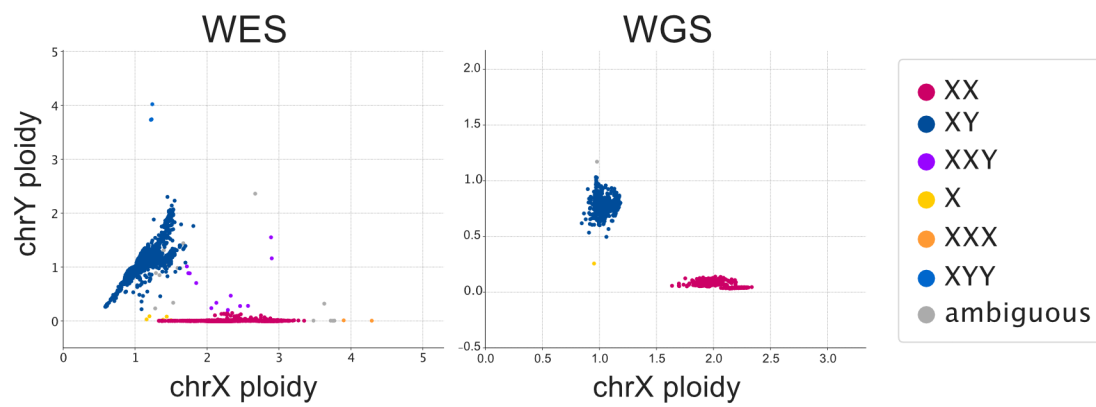

**Supplementary Fig. 3. Sex inference.** The X-axis and Y-axis represent the ploidy of chromosome X and Y, respectively, normalized by the coverage of chromosome 21.

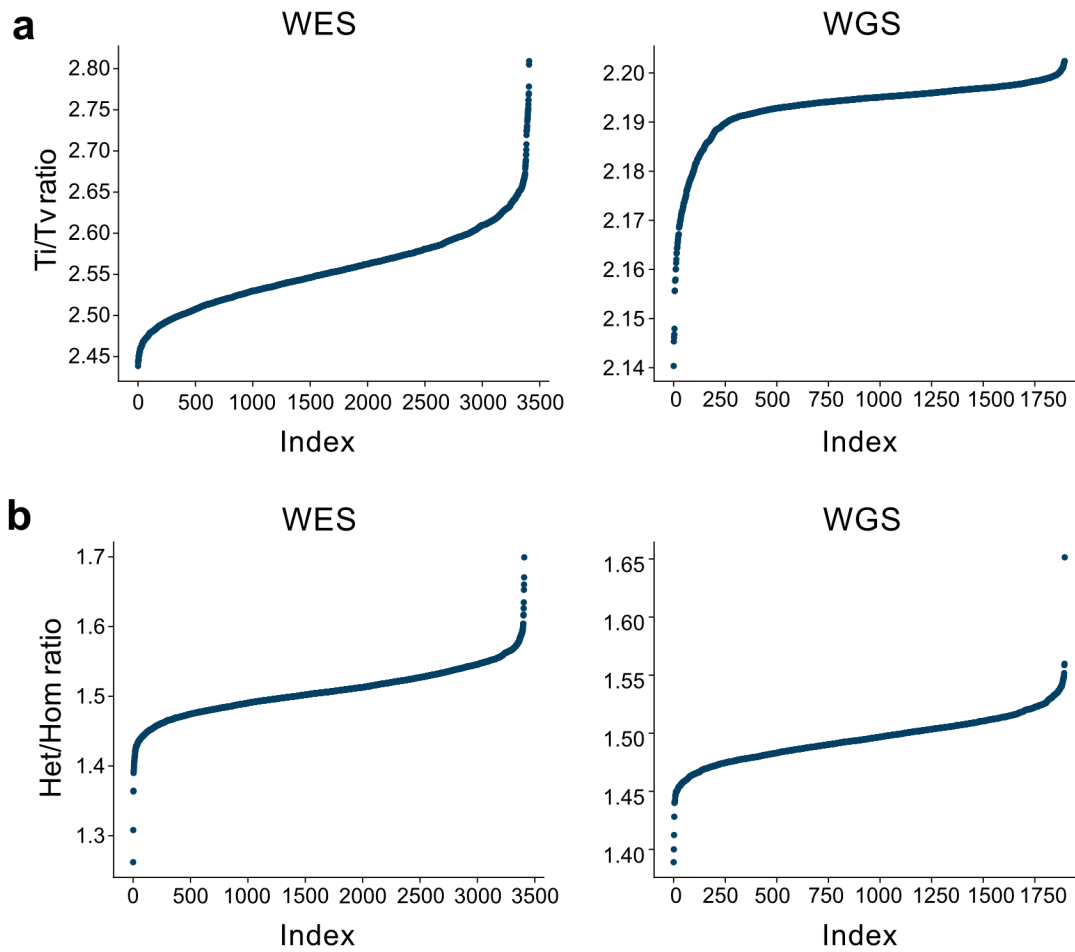

**Supplementary Fig. 4. Quality control of KOVA 2 samples.** (a) A transition/transversion (Ti/Tv) ratio value distribution for WES (left) and WGS (right) samples. (b) A heterozygous/homozygous ratio value distribution on WES (left) and on WGS (right) samples.

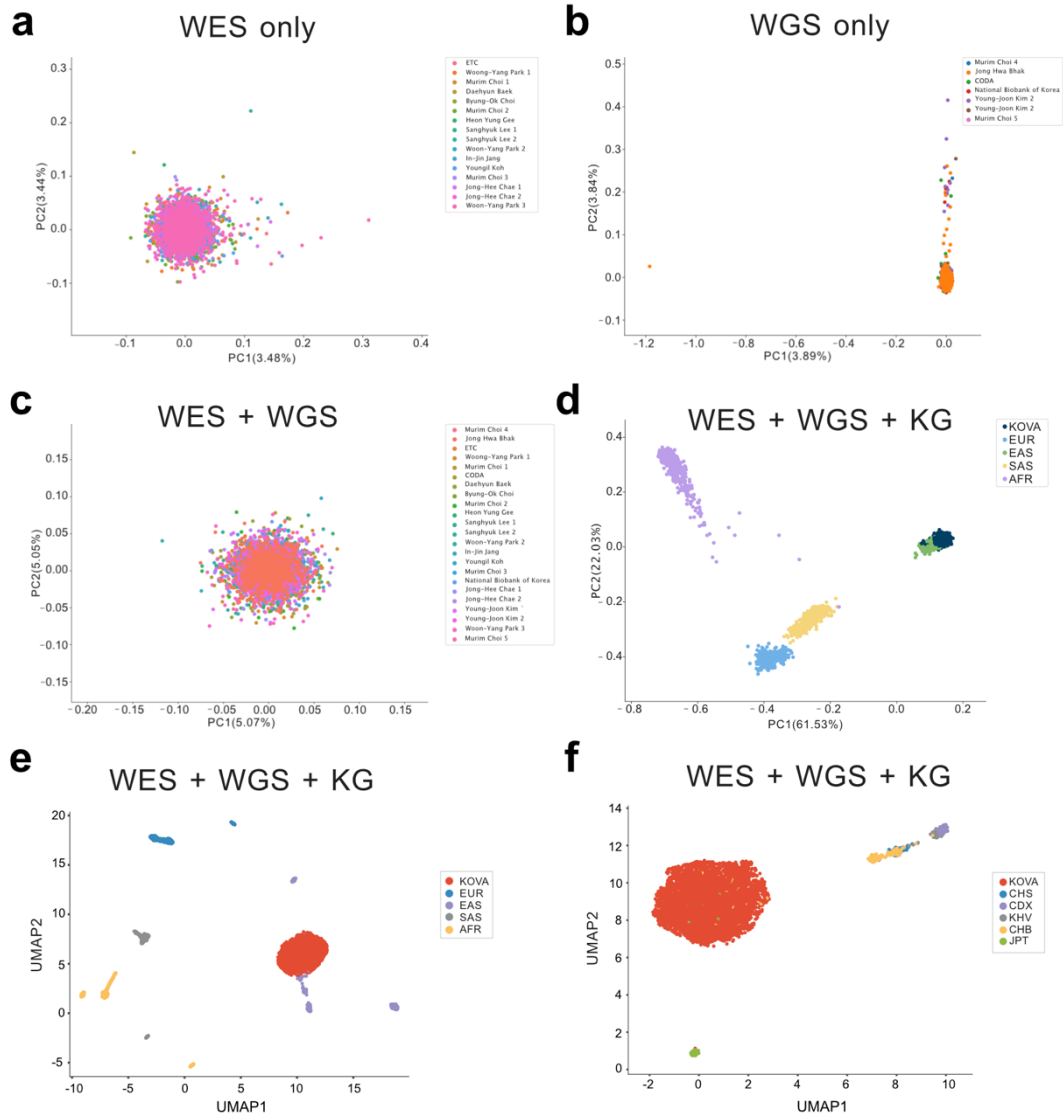

**Supplementary Fig. 5. Dimension reduction analyses of KOVA 2 samples. (a)**

PCA of KOVA 2 WES samples. (b) PCA of KOVA 2 WGS samples. (c) PCA on

WES-WGS combined samples. (d) PCA of KOVA 2 with KG individuals. (e) UMAP of

KOVA 2 with KG individuals. (f) UMAP of KOVA 2 with Asian populations.

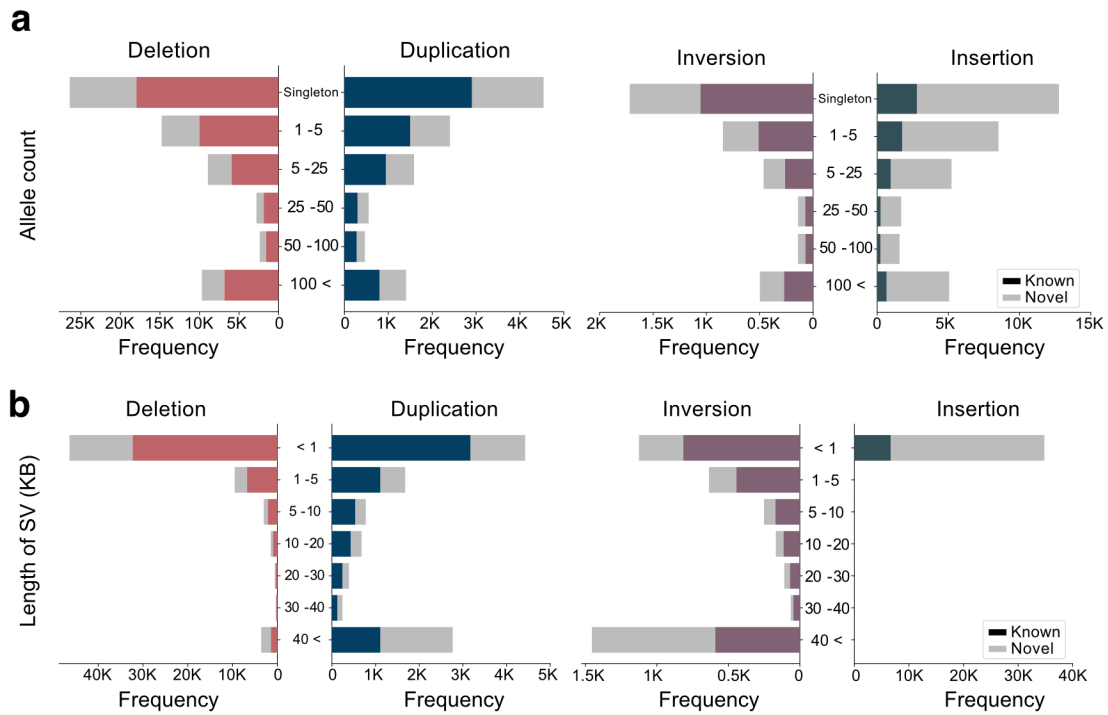

**Supplementary Fig. 6. Structural variant profile of KOVA 2.** (a) Number of SV variants by allele counts, divided by SV type, and known (dark-colored) and novel (gray-colored) variants according to gnomAD SV database. (b) Number of SV variants by the length of SV in kilobases.

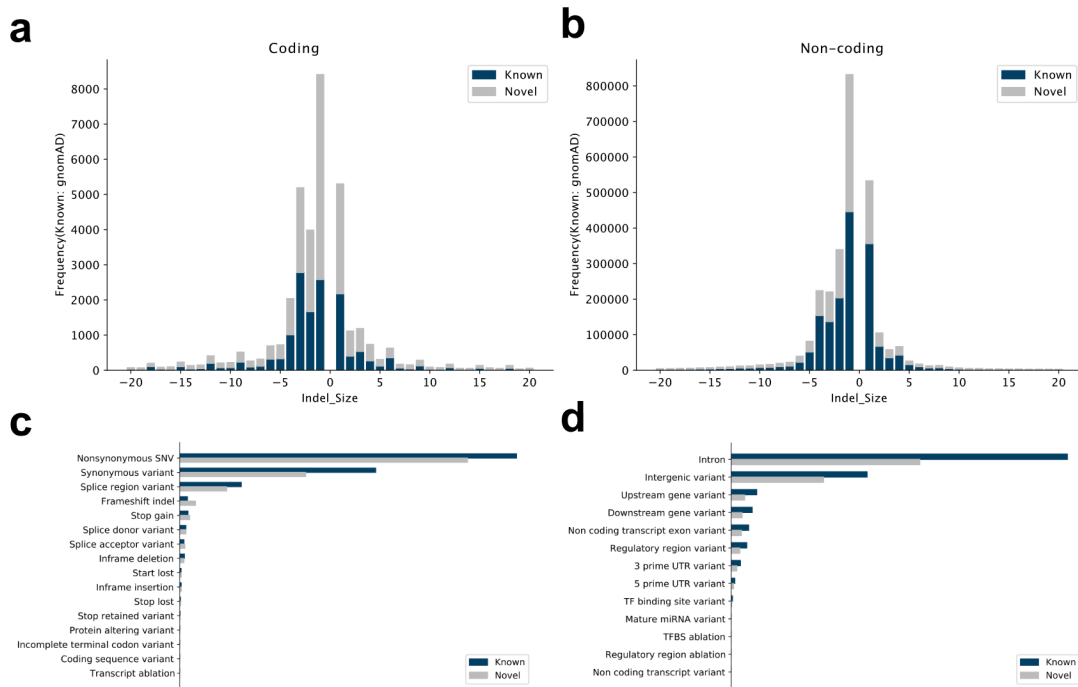

**Supplementary Fig. 7. Functional annotation analysis of KOVA 2 variants.** The distributions of indel sizes in (a) coding and (b) non-coding regions. The frequency of known variants is in dark blue. The number of variants by annotated function on (c) coding and (d) non-coding regions.



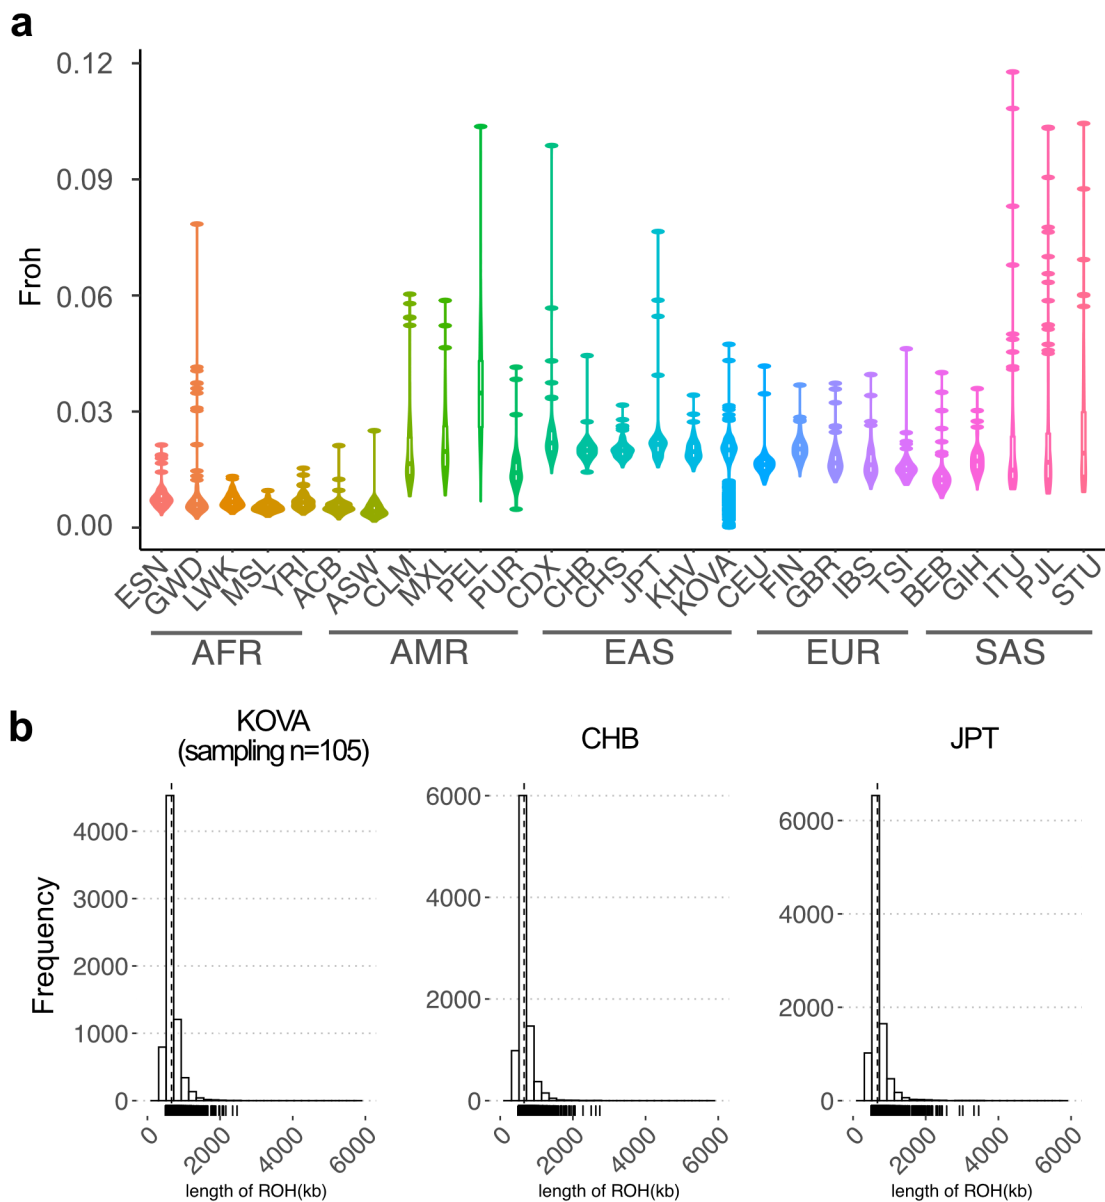

**Supplementary Fig. 8. ROH profile of KOVA 2 samples.** (a) Fraction of ROH per individual (Froh) by population, from KG. (b) Distribution of ROH interval length in KOVA 2, Han Chinese in Beijing (CHB), and Japanese (JPT).

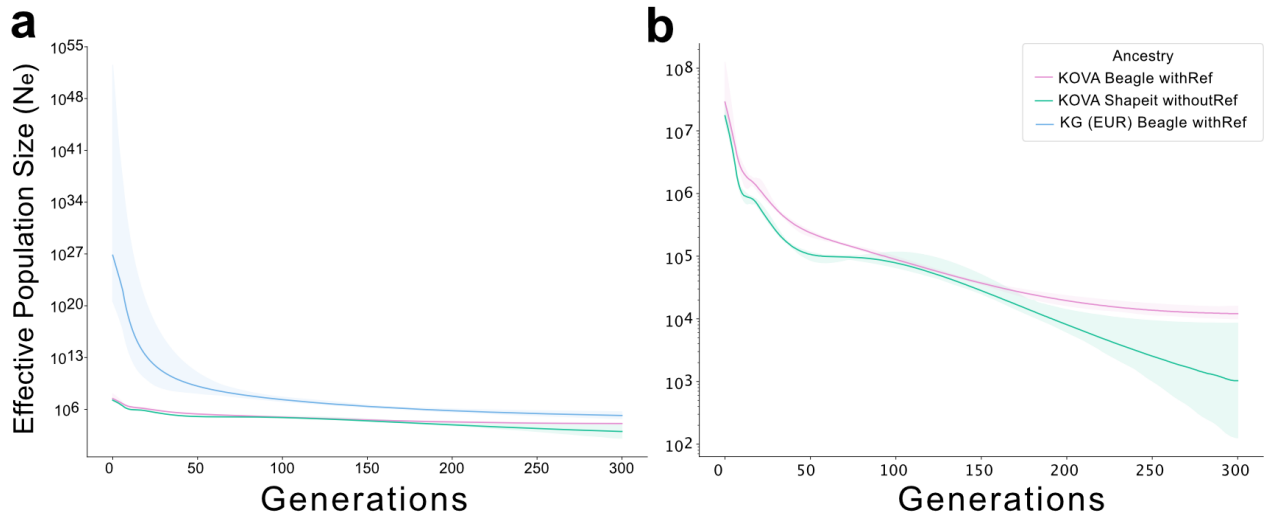

**Supplementary Fig. 9. Estimated effective population size based on KOVA. (a)** Effective Korean population size by generations before the present. (b) Estimated population size of Korean population calculated based on KOVA data, subset of (a).

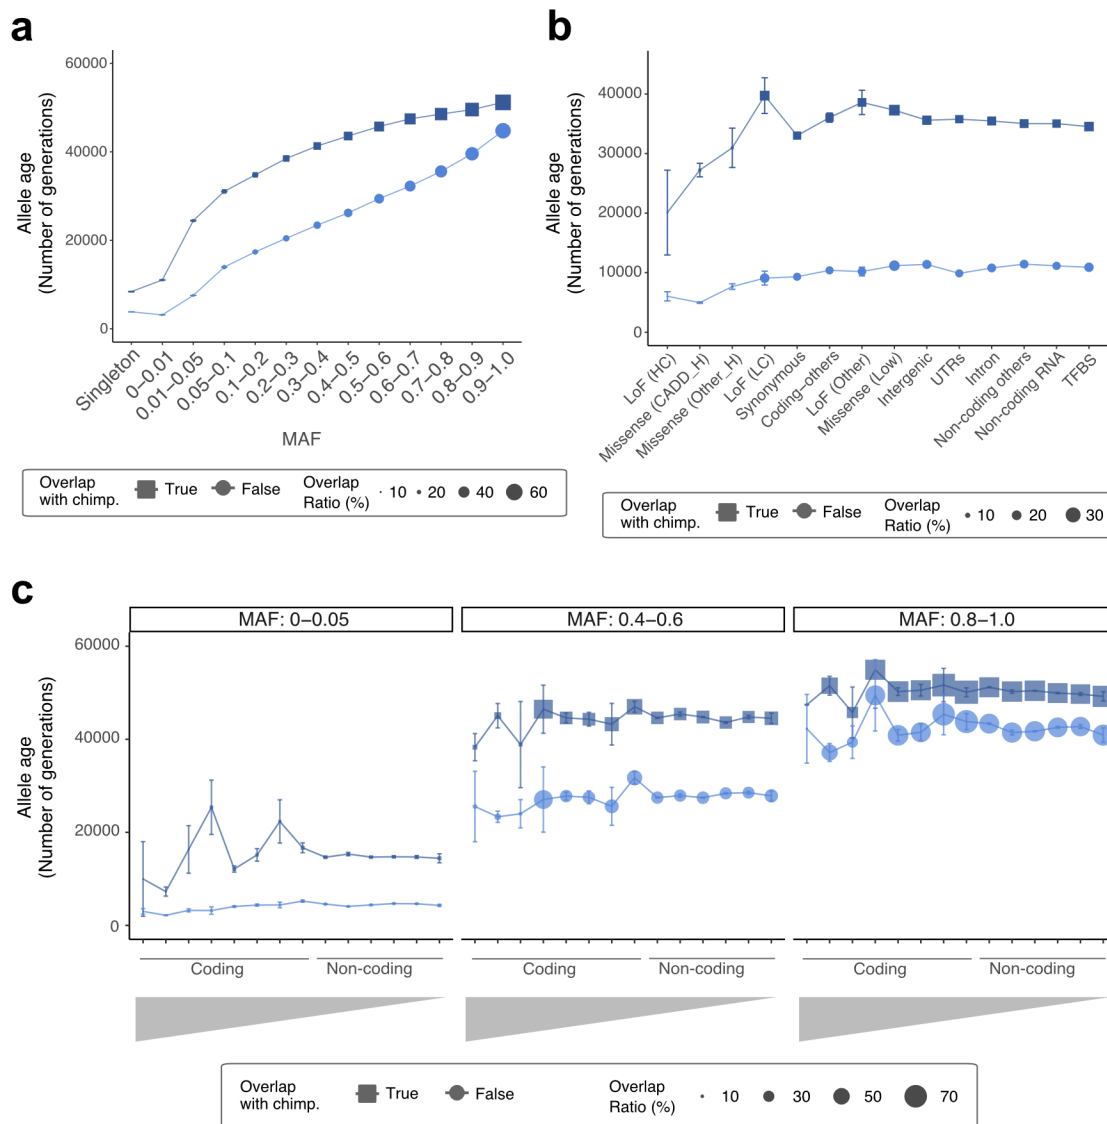

**Supplementary Fig. 10. Allele ages of KOVA 2 variants based on KG data. (a)**

Allele ages by MAF, divided by the co-occurrence from chimpanzees (squares) or

not (circles). (b) Allele ages by predicted function, divided by the co-occurrence from

chimpanzees (squares) or not (circles). (c) Allele ages by MAF and predicted

function. Three MAF intervals are displayed. The X-axis bins depicted in grey

triangles in (c) are the same as that of (b)

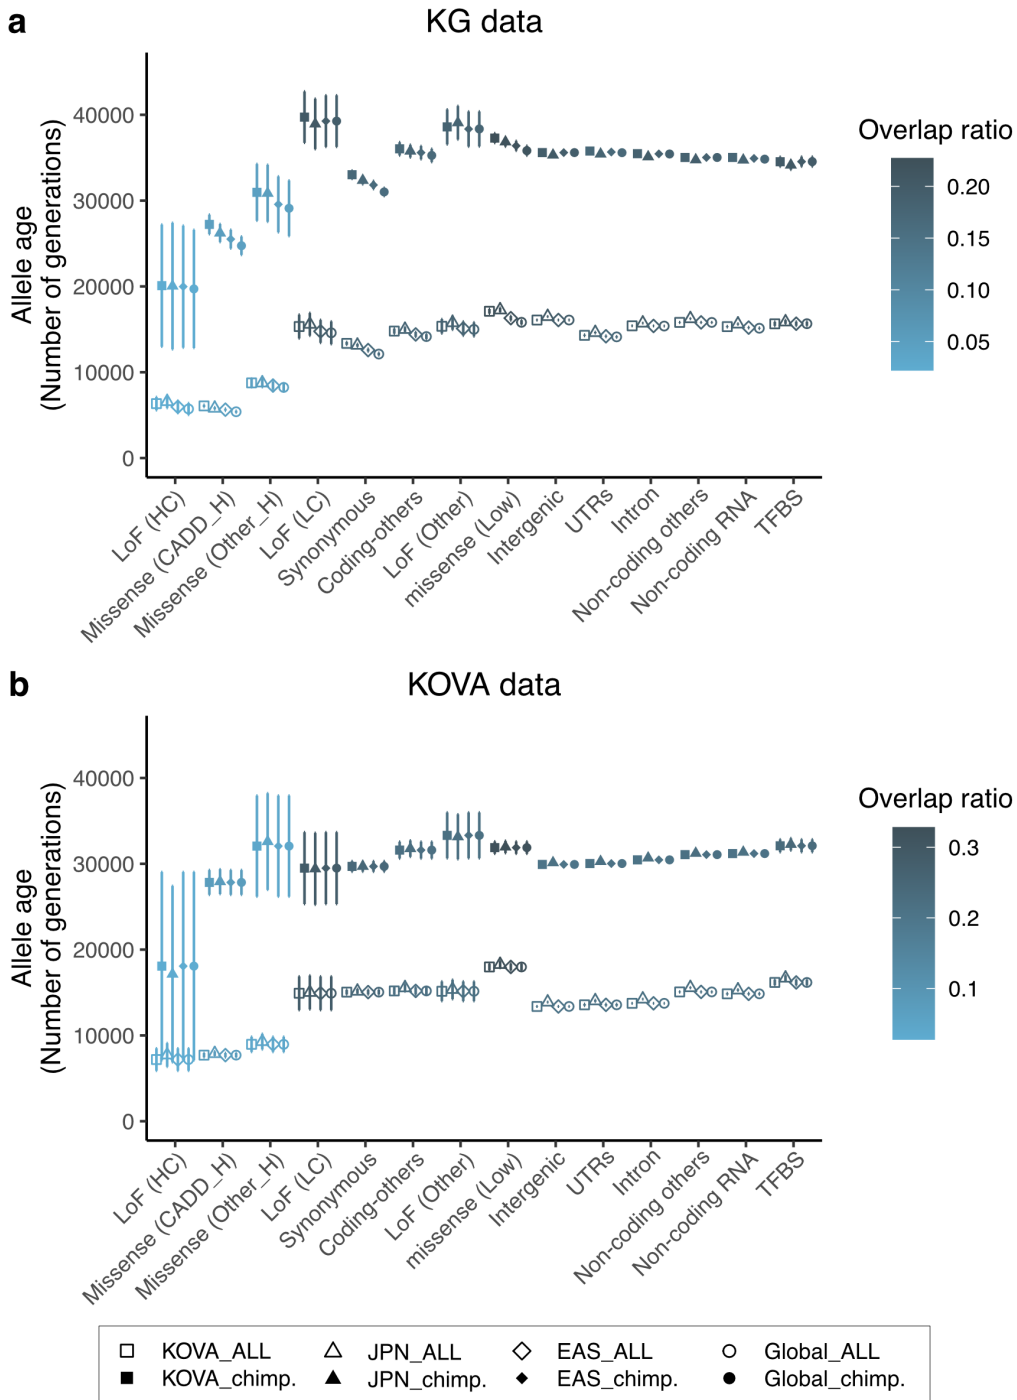

**Supplementary Fig. 11. Allele ages of KOVA 2 variants by population.** (a) Allele ages based on KG data by predicted function, divided by the co-occurrence from chimpanzees (filled) or not (blank). (b) Allele ages based on KOVA data by predicted function, divided by the co-occurrence from chimpanzees (filled) or not (blank).

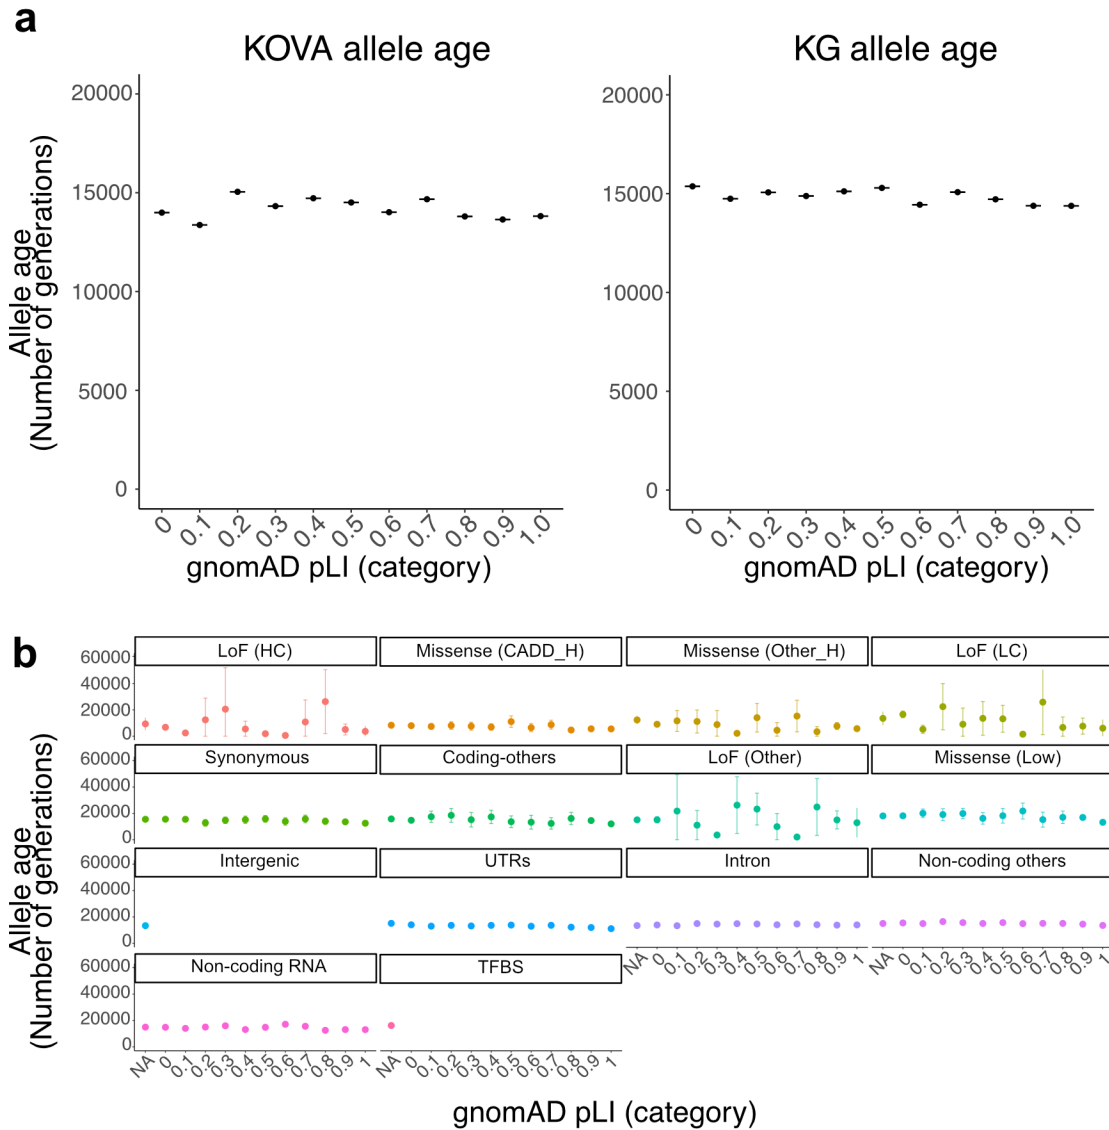

**Supplementary Fig. 12. Allele age of KOVA 2 variants by pLI score.** (a) Allele ages based on KOVA 2 data (left) and on KG data (right) by decile of gnomAD pLI score. NA represents variants without pLI scores. (b) Allele ages based on KOVA 2 data by pLI per predicted variant function.

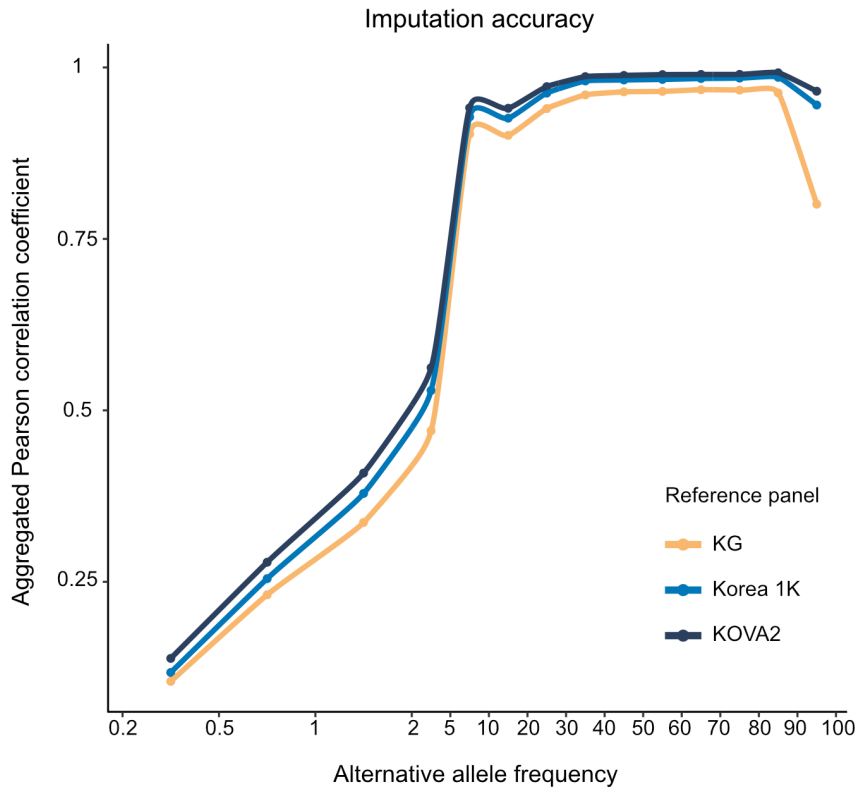

**Supplementary Fig. 13. Imputation performance of KOVA 2 reference panel.**

The aggregated Pearson correlation coefficient ( $R^2$ ) between known genotypes from WGS data and imputed genotypes by the percentage of stratified alternative allele frequency.

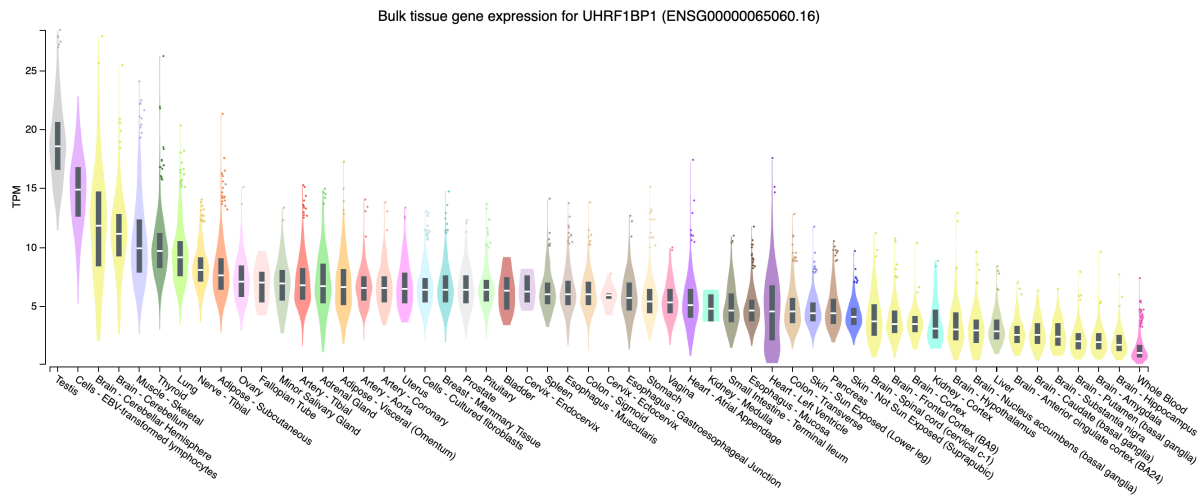

**Supplementary Fig. 14. Tissue expression profile of *UHRF1BP1*.** Displaying the highest expression in testes (on the far left; <https://gtexportal.org/home/gene/UHRF1BP1>).

**Supplementary Table 1.** Sample collection. Numbers denote number of samples after sample filtering. Note “KOVA I” denotes the data was also used in the first version of KOVA (Lee *et al.*, *Sci Reports* 2017).

| Group leader                                              | Center                                             | WES          | WGS          | Total        | Note     |
|-----------------------------------------------------------|----------------------------------------------------|--------------|--------------|--------------|----------|
| Woong-Yang Park                                           | Samsung Genome Institute                           | 1,181        | -            | 1,181        | KOVA I   |
| Jong Hwa Bhak                                             | Ulsan National Institute of Science and Technology | -            | 903          | 903          | -        |
| Murim Choi                                                | Seoul National University                          | 587          | 23           | 610          | -        |
| Jong-Hee Chae                                             | Seoul National University Children’s Hospital      | 545          | -            | 545          | KOVA I   |
| National Biobank of Korea                                 | Korea Biobank Project                              | -            | 347          | 347          | -        |
| Young-Joon Kim                                            | Yonsei University                                  | -            | 324          | 324          | -        |
| The National Center for Medical Information and Knowledge | Clinical & Omics Data Archive (CODA)               | -            | 299          | 299          | -        |
| Youngil Koh                                               | Seoul National University Hospital                 | 284          | -            | 284          | -        |
| Daehyun Baek                                              | Seoul National University                          | 222          | -            | 222          | KOVA I   |
| Sanghyuk Lee                                              | Ewha Womans University                             | 194          | -            | 194          | KOVA I   |
| In-Jin Jang                                               | Seoul National University                          | 118          | -            | 118          | KOVA I   |
| ETC                                                       |                                                    | 224          | -            | 224          | -        |
| Heon Yung Gee                                             | Yonsei University                                  | 45           | -            | 45           | -        |
| Byung-Ok Choi                                             | Samsung Medical Center                             | 9            | -            | 9            | -        |
| <b>Total</b>                                              |                                                    | <b>3,409</b> | <b>1,896</b> | <b>5,305</b> | <b>-</b> |



**Supplementary Table 2.** Sample quality control process of WES data

| <b>Step</b> | <b>Condition</b>                       | <b># of removed samples</b> | <b>Before</b> | <b>After</b> |
|-------------|----------------------------------------|-----------------------------|---------------|--------------|
| 1           | Ambiguous clinical status              | 306                         | 4,235         | 3,929        |
| 2           | Low coverage depth (meanCoverage < 40) | 77                          | 3,929         | 3,852        |
| 3           | Ambiguous sex                          | 92                          | 3,852         | 3,760        |
| 4           | Duplicated (kin > 0.35)                | 164                         | 3,760         | 3,596        |
| 5           | Related (0.1 < kin <= 0.35)            | 22                          | 3,596         | 3,574        |
| 6           | Ambiguous ethnicity                    | 91                          | 3,574         | 3,483        |
| 7           | Het/hom ratio outlier (ratio > 1.8)    | 22                          | 3,483         | 3,461        |
| 8           | In both WES and WGS                    | 52                          | 3,461         | 3,409        |
|             | <b>Total</b>                           | <b>849</b>                  |               | <b>3,409</b> |

**Supplementary Table 3.** Sample quality control process of WGS data

| <b>Step</b> | <b>Condition</b>                       | <b>Removed samples</b> | <b>Before</b> | <b>After</b> |
|-------------|----------------------------------------|------------------------|---------------|--------------|
| 1           | Low coverage depth (meanCoverage < 10) | 165                    | 2,396         | 2,231        |
| 2           | Ambiguous sex                          | 10                     | 2,231         | 2,221        |
| 3           | Duplicated (kin > 0.35)                | 144                    | 2,221         | 2,077        |
| 4           | Related (0.1 < kin ≤ 0.35)             | 149                    | 2,077         | 1,928        |
| 5           | Ambiguous ethnicity                    | 32                     | 1,928         | 1,896        |
|             | <b>Total</b>                           | <b>500</b>             |               | <b>1,896</b> |

**Supplementary Table 4. Variant counts by functional class**

| Coding/<br>noncoding | Variant<br>function                | # of<br>Singletons | # of non-<br>singletons | total AC  | # of known<br>variants | # of novel<br>variants |
|----------------------|------------------------------------|--------------------|-------------------------|-----------|------------------------|------------------------|
| Coding               | Transcript ablation                | 1                  | 3                       | 4         | 3                      | 1                      |
|                      | Coding sequence variant            | 14                 | 16                      | 30        | 22                     | 8                      |
|                      | Incomplete terminal codon variant  | 15                 | 19                      | 34        | 13                     | 21                     |
|                      | Protein altering variant           | 130                | 31                      | 161       | 43                     | 118                    |
|                      | Stop retained variant              | 237                | 215                     | 452       | 203                    | 249                    |
|                      | Stop lost                          | 616                | 567                     | 1,183     | 502                    | 681                    |
|                      | Inframe insertion                  | 1,421              | 1,073                   | 2,494     | 1,206                  | 1,288                  |
|                      | Start lost                         | 1,389              | 1,017                   | 2,406     | 1,106                  | 1,300                  |
|                      | Inframe deletion                   | 4,043              | 3,021                   | 7,064     | 3,780                  | 3,284                  |
|                      | Splice acceptor variant            | 4,227              | 3,212                   | 7,439     | 3,317                  | 4,122                  |
|                      | Splice donor variant               | 5,243              | 4,618                   | 9,861     | 4,887                  | 4,974                  |
|                      | Stop gain                          | 9,246              | 5,399                   | 14,645    | 6,647                  | 7,998                  |
|                      | Frameshift indel                   | 12,239             | 6,583                   | 18,822    | 6,157                  | 12,665                 |
|                      | Splice region variant              | 43,437             | 43,699                  | 87,136    | 49,383                 | 37,753                 |
|                      | Synonymous variant                 | 127,844            | 130,603                 | 258,447   | 157,345                | 101,102                |
| Nonsynonymous SNV    | 274,693                            | 226,818            | 501,511                 | 270,422   | 231,089                |                        |
| Noncoding            | Non coding transcript variant      | -                  | 1                       | 1         | 1                      | -                      |
|                      | Regulatory region ablation         | 1                  | -                       | 1         | 1                      | -                      |
|                      | TFBS ablation                      | 112                | 121                     | 233       | 143                    | 90                     |
|                      | Mature miRNA variant               | 564                | 563                     | 1,127     | 620                    | 507                    |
|                      | TF binding site variant            | 41,715             | 48,332                  | 90,047    | 58,693                 | 31,354                 |
|                      | 5 prime UTR variant                | 141,718            | 145,808                 | 287,526   | 172,423                | 115,103                |
|                      | 3 prime UTR variant                | 341,553            | 361,410                 | 702,963   | 436,082                | 266,881                |
|                      | Regulatory region variant          | 529,226            | 619,532                 | 1,148,758 | 737,657                | 411,101                |
|                      | Non coding transcript exon variant | 615,209            | 696,435                 | 1,311,644 | 826,591                | 485,053                |
|                      | Downstream gene variant            | 690,767            | 820,003                 | 1,510,770 | 993,375                | 517,395                |

|  |                       |                   |                   |                   |                   |                   |
|--|-----------------------|-------------------|-------------------|-------------------|-------------------|-------------------|
|  | Upstream gene variant | 843,801           | 993,065           | 1,836,866         | 1,203,204         | 633,662           |
|  | Intergenic variant    | 4,929,501         | 5,832,094         | 10,761,595        | 6,406,273         | 4,355,322         |
|  | Intron                | 11,580,871        | 13,158,563        | 24,739,434        | 15,849,148        | 8,890,286         |
|  | <b>Total</b>          | <b>20,199,833</b> | <b>23,102,821</b> | <b>43,302,654</b> | <b>27,189,247</b> | <b>16,113,407</b> |

**Supplementary Table 5. Allele age by variant class**

| Variant class             | All variants    |                 |               |               | Variants co-occurred from chimpanzee |                 |               |               | Ratio<br>(The co-occurrence from Chimp/All) |                 |               |               |
|---------------------------|-----------------|-----------------|---------------|---------------|--------------------------------------|-----------------|---------------|---------------|---------------------------------------------|-----------------|---------------|---------------|
|                           | kova allele age | kova allele cnt | kg allele age | kg allele cnt | kova allele age                      | kova allele cnt | kg allele age | kg allele cnt | kova allele age                             | kova allele cnt | kg allele age | kg allele cnt |
| <b>LoF (HC)</b>           | 7,190           | 431             | 6,343         | 1,123         | 18,075                               | 12              | 20,090        | 25            | 2.51                                        | 0.03            | 3.17          | 0.02          |
| <b>Missense (Other_H)</b> | 8,962           | 1,164           | 8,759         | 3,484         | 32,063                               | 50              | 30,963        | 163           | 3.58                                        | 0.04            | 3.53          | 0.05          |
| <b>Missense (CADD_H)</b>  | 7,704           | 12,567          | 6,075         | 36,661        | 27,832                               | 945             | 27,227        | 1,815         | 3.61                                        | 0.08            | 4.48          | 0.05          |
| <b>intergenic</b>         | 13,374          | 1,898,606       | 16,082        | 2,608,107     | 29,926                               | 391,635         | 35,596        | 505,764       | 2.24                                        | 0.21            | 2.21          | 0.19          |
| <b>intron</b>             | 13,742          | 4,353,161       | 15,409        | 6,593,118     | 30,459                               | 915,522         | 35,470        | 1,233,526     | 2.22                                        | 0.21            | 2.30          | 0.19          |
| <b>ncRNA</b>              | 14,846          | 190,890         | 15,313        | 326,043       | 31,192                               | 40,277          | 35,030        | 56,884        | 2.10                                        | 0.21            | 2.29          | 0.17          |
| <b>UTRs</b>               | 13,565          | 121,912         | 14,302        | 225,036       | 30,031                               | 25,877          | 35,776        | 38,390        | 2.21                                        | 0.21            | 2.50          | 0.17          |
| <b>nc-others</b>          | 15,093          | 747,565         | 15,805        | 1,234,003     | 31,091                               | 163,582         | 35,018        | 229,091       | 2.06                                        | 0.22            | 2.22          | 0.19          |
| <b>coding-others</b>      | 15,137          | 8,618           | 14,787        | 16,819        | 31,490                               | 1,901           | 36,065        | 2,883         | 2.08                                        | 0.22            | 2.44          | 0.17          |
| <b>synonymous</b>         | 15,062          | 18,811          | 13,362        | 48,377        | 29,723                               | 4,600           | 32,997        | 8,260         | 1.97                                        | 0.24            | 2.47          | 0.17          |
| <b>LoF (LC)</b>           | 14,914          | 400             | 15,325        | 840           | 29,496                               | 114             | 39,728        | 171           | 1.98                                        | 0.29            | 2.59          | 0.20          |
| <b>Missense (Low)</b>     | 17,979          | 10,403          | 17,105        | 24,103        | 31,886                               | 3,367           | 37,284        | 5,475         | 1.77                                        | 0.32            | 2.18          | 0.23          |

**Supplementary Table 6.** The number of concordant or discordant variant pairs between PacBio and KOVA pipeline from a single sample.

|               | Genotype | KOVA2  |           |           | Total     |
|---------------|----------|--------|-----------|-----------|-----------|
|               |          | 0/0    | 0/1       | 1/1       |           |
| <b>PacBio</b> | 0/0      | 46,220 | 3,820     | 610       | 293,949   |
|               | 0/1      | 11,411 | 1,974,392 | 675       | 2,177,575 |
|               | 1/1      | 742    | 3,613     | 1,548,512 | 1,734,669 |

**Supplementary Table 7.** The number of concordant or discordant variant pairs between NovaSeq and KOVA pipeline from a single sample.

|         | Genotype | KOVA2 |           |           | Total     |
|---------|----------|-------|-----------|-----------|-----------|
|         |          | 0/0   | 0/1       | 1/1       |           |
| NovaSeq | 0/0      | -     | -         | -         | -         |
|         | 0/1      | 5,562 | 2,064,129 | 1,215     | 2,297,291 |
|         | 1/1      | 56    | 1,028     | 1,495,016 | 1,629,156 |

**Supplementary Table 8.** Comparison of Sanger-validate calls and KOVA 2 calls.

Hom. Ref., homozygous reference; Het., heterozygous.

| No. | KOVA2 sample ID | chr:position (hg38) | Sanger result | KOVA2 call |               |                  | Concordant? |
|-----|-----------------|---------------------|---------------|------------|---------------|------------------|-------------|
|     |                 |                     |               | Call       | Ref. coverage | Nonref. coverage |             |
| 1   | KVE0617         | chr4:15059272       | Hom. Ref.     | Hom. Ref.  | 65            | 0                | Yes         |
| 2   | KVE0632         | chr8:60743012       | Hom. Ref.     | Hom. Ref.  | 17            | 0                | Yes         |
| 3   | KVE0633         | chr8:60743012       | Hom. Ref.     | Hom. Ref.  | 16            | 0                | Yes         |
| 4   | KVE0853         | chr4:15059272       | Hom. Ref.     | Hom. Ref.  | 84            | 0                | Yes         |
| 5   | KVE0909         | chr10:72551287      | Hom. Ref.     | Hom. Ref.  | 39            | 0                | Yes         |
| 6   | KVE2741         | chr6:75087652       | Hom. Ref.     | Hom. Ref.  | 39            | 0                | Yes         |
| 7   | KVE2758         | chr9:137162182      | Hom. Ref.     | Hom. Ref.  | 28            | 0                | Yes         |
| 8   | KVE2759         | chr9:137162182      | Hom. Ref.     | Hom. Ref.  | 38            | 0                | Yes         |
| 9   | KVE2778         | chr16:48361909      | Hom. Ref.     | Hom. Ref.  | 152           | 0                | Yes         |
| 10  | KVE2779         | chr16:48361909      | Hom. Ref.     | Hom. Ref.  | 225           | 0                | Yes         |
| 11  | KVE2782         | chr22:27751027      | Hom. Ref.     | Hom. Ref.  | 46            | 0                | Yes         |
| 12  | KVE2783         | chr22:27751027      | Hom. Ref.     | Hom. Ref.  | 49            | 0                | Yes         |
| 13  | KVE2785         | chr22:23787200      | Hom. Ref.     | Hom. Ref.  | 128           | 0                | Yes         |
| 14  | KVE2786         | chr22:23787200      | Hom. Ref.     | Hom. Ref.  | 143           | 0                | Yes         |
| 15  | KVE2787         | chr6:157184324      | Hom. Ref.     | Hom. Ref.  | 190           | 0                | Yes         |
| 16  | KVE2788         | chr6:157184324      | Hom. Ref.     | Hom. Ref.  | 177           | 0                | Yes         |
| 17  | KVE2791         | chr16:56354885      | Hom. Ref.     | Hom. Ref.  | 236           | 1                | Yes         |
| 18  | KVE2792         | chr16:56354885      | Hom. Ref.     | Hom. Ref.  | 160           | 0                | Yes         |
| 19  | KVE2797         | chr17:63964667      | Hom. Ref.     | Hom. Ref.  | 13            | 0                | Yes         |
| 20  | KVE2798         | chr17:63964667      | Hom. Ref.     | Hom. Ref.  | 9             | 0                | Yes         |
| 21  | KVE2799         | chrX:53382505       | Hom. Ref.     | Hom. Ref.  | 128           | 0                | Yes         |
| 22  | KVE2800         | chrX:53382505       | Hom. Ref.     | Hom. Ref.  | 63            | 0                | Yes         |
| 23  | KVE2807         | chr12:45837577      | Hom. Ref.     | Hom. Ref.  | 242           | 0                | Yes         |
| 24  | KVE2808         | chr12:45837577      | Hom. Ref.     | Hom. Ref.  | 223           | 2                | Yes         |
| 25  | KVE2809         | chr16:67539861      | Hom. Ref.     | Hom. Ref.  | 37            | 1                | Yes         |
| 26  | KVE2810         | chr16:67539861      | Hom. Ref.     | Hom. Ref.  | 41            | 0                | Yes         |
| 27  | KVE2811         | chr12:32733792      | Hom. Ref.     | Hom. Ref.  | 41            | 0                | Yes         |
| 28  | KVE2812         | chr12:32733792      | Hom. Ref.     | Hom. Ref.  | 44            | 0                | Yes         |



|    |         |                 |           |           |     |    |     |
|----|---------|-----------------|-----------|-----------|-----|----|-----|
| 29 | KVE2816 | chrX:71564608   | Hom. Ref. | Hom. Ref. | 40  | 0  | Yes |
| 30 | KVE2822 | chr14:101980380 | Hom. Ref. | Hom. Ref. | 25  | 0  | Yes |
| 31 | KVE2823 | chr14:101980380 | Hom. Ref. | Hom. Ref. | 16  | 0  | Yes |
| 32 | KVE2840 | chr12:49033931  | Hom. Ref. | Hom. Ref. | 43  | 0  | Yes |
| 33 | KVE2841 | chr12:49033931  | Hom. Ref. | Hom. Ref. | 43  | 0  | Yes |
| 34 | KVE3585 | chr2:86252036   | Hom. Ref. | Hom. Ref. | 77  | 0  | Yes |
| 35 | KVE3586 | chr3:155084298  | Hom. Ref. | Hom. Ref. | 35  | 0  | Yes |
| 36 | KVE3640 | chr13:110176904 | Hom. Ref. | Hom. Ref. | 86  | 0  | Yes |
| 37 | KVE3641 | chr13:110176904 | Hom. Ref. | Hom. Ref. | 100 | 0  | Yes |
| 38 | KVE3645 | chr9:2081979    | Hom. Ref. | Hom. Ref. | 34  | 0  | Yes |
| 39 | KVE3646 | chr9:2081979    | Hom. Ref. | Hom. Ref. | 37  | 0  | Yes |
| 40 | KVE3780 | chr19:50323104  | Hom. Ref. | Hom. Ref. | 18  | 0  | Yes |
| 41 | KVE3805 | chr18:33740159  | Hom. Ref. | Hom. Ref. | 36  | 0  | Yes |
| 42 | KVE3812 | chrX:115165459  | Hom. Ref. | Hom. Ref. | 8   | 0  | Yes |
| 43 | KVE3825 | chr6:33451838   | Hom. Ref. | Hom. Ref. | 25  | 0  | Yes |
| 44 | KVE3826 | chr6:33451838   | Hom. Ref. | Hom. Ref. | 16  | 0  | Yes |
| 45 | KVE3835 | chrX:53234559   | Hom. Ref. | Hom. Ref. | 94  | 0  | Yes |
| 46 | KVE3836 | chrX:53234559   | Hom. Ref. | Hom. Ref. | 50  | 1  | Yes |
| 47 | KVE3837 | chr1:181651440  | Hom. Ref. | Hom. Ref. | 105 | 0  | Yes |
| 48 | KVE3838 | chr1:181651440  | Hom. Ref. | Hom. Ref. | 68  | 0  | Yes |
| 49 | KVE4140 | chr22:50675152  | Hom. Ref. | Hom. Ref. | 13  | 0  | Yes |
| 50 | KVE4141 | chr22:50675152  | Hom. Ref. | Hom. Ref. | 6   | 0  | Yes |
| 51 | KVE4142 | chr1:27552049   | Hom. Ref. | Hom. Ref. | 11  | 0  | Yes |
| 52 | KVE4143 | chr1:27552049   | Hom. Ref. | Hom. Ref. | 20  | 0  | Yes |
| 53 | KVE4144 | chr11:118758879 | Hom. Ref. | Hom. Ref. | 34  | 0  | Yes |
| 54 | KVE4145 | chr11:118758879 | Hom. Ref. | Hom. Ref. | 38  | 0  | Yes |
| 55 | KVE0634 | chr3:33018452   | Het.      | Het.      | 31  | 23 | Yes |
| 56 | KVE0635 | chr3:33068263   | Het.      | Het.      | 44  | 39 | Yes |
| 57 | KVE0749 | chr3:33018452   | Het.      | Het.      | 39  | 29 | Yes |
| 58 | KVE0750 | chr3:33018452   | Het.      | Het.      | 31  | 27 | Yes |
| 59 | KVE0908 | chr10:72551287  | Het.      | Het.      | 84  | 50 | Yes |
| 60 | KVE2742 | chr6:75087652   | Het.      | Het.      | 21  | 16 | Yes |
| 61 | KVE2789 | chr1:180274413  | Het.      | Het.      | 71  | 61 | Yes |
| 62 | KVE2790 | chr1:180274571  | Het.      | Het.      | 37  | 36 | Yes |

|    |             |                 |      |         |    |    |     |
|----|-------------|-----------------|------|---------|----|----|-----|
| 63 | KVE2815 (F) | chrX:71564608   | Het. | Het.    | 53 | 50 | Yes |
| 64 | KVE2836     | chr10:133364730 | Het. | Het.    | 51 | 67 | Yes |
| 65 | KVE2837     | chr10:133373332 | Het. | Het.    | 5  | 12 | Yes |
| 66 | KVE3587     | chr3:155084298  | Het. | Het.    | 28 | 27 | Yes |
| 67 | KVE3638     | chr19:55137102  | Het. | Het.    | 36 | 30 | Yes |
| 68 | KVE3639     | chr19:55134092  | Het. | Het.    | 29 | 25 | Yes |
| 69 | KVE3806     | chr18:33740159  | Het. | Het.    | 47 | 53 | Yes |
| 70 | KVE3779     | chr19:50323104  | Het. | No call | 1  | 8  | No  |
| 71 | KVE3811(F)  | chrX:115165459  | Het. | No call | 1  | 4  | No  |

**Supplementary Table 9.** The number of variants covered by WES, WGS only or by both methods.

| MAF      | Number of variants |          |          | Concordance |
|----------|--------------------|----------|----------|-------------|
|          | Both               | WES only | WGS only |             |
| 0.05-0.1 | 7,041              | 55       | 911      | 87.9%       |
| 0.1-0.2  | 8,200              | 60       | 1,090    | 87.7%       |
| 0.2-0.3  | 5,335              | 34       | 662      | 88.5%       |
| 0.3-0.4  | 4,147              | 30       | 557      | 87.6%       |
| 0.4-0.5  | 3,323              | 29       | 389      | 88.8%       |
| 0.5-0.6  | 2,949              | 23       | 329      | 89.3%       |
| 0.6-0.7  | 2,425              | 20       | 266      | 89.5%       |
| 0.7-0.8  | 2,063              | 8        | 233      | 89.5%       |
| 0.8-0.9  | 2,054              | 12       | 216      | 90.0%       |
| 0.9-1.0  | 2,657              | 24       | 271      | 90.0%       |
| Total    | 40,194             | 295      | 4,924    | 88.5%       |
